# Supplementary material for: Impact of high-power short-duration atrial fibrillation ablation technique on the incidence of silent cerebral embolism: a prospective randomized controlled study
Source: BMC Med. 2023 Nov 23;21:461. doi: 10.1186/s12916-023-03180-3 (PMC10666361; doi:10.1186/s12916-023-03180-3)
Supplement: Supplementary file 1 — Additional file 1: Table S1. The oral anticoagulants information of enrolled AF patients. [file 12916_2023_3180_MOESM1_ESM.xlsx]

## Sheet: Table 1
Table S1. The oral anticoagulants information of enrolled AF patients
Anticoagulants	Before ablation procedure			After ablation procedure
	HPSD group (n=50)	Conventional group (n=50)		HPSD group (n=50)	Conventional group (n=50)
Rivaroxaban (n, %)	28 (56%)	21 (42%)		29 (58%)	21 (42%)
Dabigatran (n, %)	21 (42%)	22 (44%)		21 (42%)	22 (44%)
Edoxaban (n, %)	0	6 (12%)		0	6 (12%)
Warfarin (n, %)	1 (2%)	1 (2%)		0	1 (2%)
AF = Atrial fibrillation, HPSD = High-power short-duration.
